# Supplementary material for: Pak1 kinase controls cell shape through ribonucleoprotein granules
Source: eLife. 2021 Jul 20;10:e67648. doi: 10.7554/eLife.67648 (PMC8318594; doi:10.7554/eLife.67648)
Supplement: Figure 1—source data 1. [file elife-67648-fig1-data1.xlsx]

## Sheet: Figure 1D
Number of Sts5 granules
wild type	pak1-as
0	5
0	3
0	7
0	8
0	4
0	4
0	5
0	8
1	13
3	17
0	5
0	9
0	11
0	8
1	6
0	10
0	13
0	19
0	8
0	10
0	9
0	14
0	11
0	15
1	7
0	11
0	7
0	11
1	15
0	16
0	21
0	9
0	6
0	6
1	15
0	8
0	13
0	5
0	8
1	13
0	12
0	13
0	7
1	10
0	12
2	8
4	8
0	9
0	9
0	6

## Sheet: Figure 1E
Septation Index
wild type	sts5Δ	pak1-as	pak1-as sts5Δ
23.1343	26.616	48.8889	34.7015
25.3676	20.7273	45.4545	27.3408
20.5534	21.8391	55.4422	32.8413

## Sheet: Figure 1H
Number of Sts5 granules
wild type	S261A	S264A	S261A S264A
0	6	0	3
0	6	0	2
0	5	0	10
0	4	1	2
0	2	1	5
3	7	0	10
0	9	0	4
0	4	0	6
0	9	0	2
0	13	1	6
0	4	0	5
1	6	0	5
1	6	0	7
0	3	1	0
0	6	0	9
1	10	1	4
0	6	0	5
0	5	0	8
0	7	1	7
0	10	0	3
0	11	2	7
1	11	0	7
1	1	0	9
1	2	3	1
1	10	1	2
0	1	2	4
0	4	2	2
0	2	5	6
3	3	0	4
0	3	0	11
2	3	0	8
1	7	1	7
0	6	1	10
0	9	1	7
1	2	0	2
0	5	1	2
0	6	1	3
2	10	3	11
1	7	0	7
0	2	0	5
0	4	1	7
0	5	1	4
0	8	0	3
0	5	0	7
1	3	0	3
0	7	0	1
0	3	4	4
1	10	3	1
2	4	0	5
0	6	0	7
