# Supplementary material for: Pak1 kinase controls cell shape through ribonucleoprotein granules
Source: eLife. 2021 Jul 20;10:e67648. doi: 10.7554/eLife.67648 (PMC8318594; doi:10.7554/eLife.67648)
Supplement: Figure 2—figure supplement 2—source data 1. [file elife-67648-fig2-figsupp2-data1.xlsx]

## Sheet: Figure 2-figure supplement 2
% monopolar cells
wild type	S86A	S261A	2A
34.127	67.7419	65.625	83.9623
30.7692	71.7742	59.2857	79.5276
32.5758	58.209	66.3366	78.0488
