# Supplementary material for: Pak1 kinase controls cell shape through ribonucleoprotein granules
Source: eLife. 2021 Jul 20;10:e67648. doi: 10.7554/eLife.67648 (PMC8318594; doi:10.7554/eLife.67648)
Supplement: Figure 2—source data 1. [file elife-67648-fig2-data1.xlsx]

## Sheet: Figure 2D
Number of Sts5 Granules
wild type	S86A	S261A	2A
0	4	1	12
0	6	3	16
0	8	5	25
0	5	11	25
0	5	9	12
0	7	11	19
0	6	6	18
1	3	15	11
0	1	7	16
2	4	10	13
1	9	8	10
0	13	11	9
1	9	7	19
0	2	4	14
0	4	19	20
3	5	3	19
1	6	4	26
0	4	6	24
0	17	7	17
3	1	3	18
0	10	1	12
0	8	6	14
1	7	7	21
0	1	15	8
3	2	4	9
2	2	3	9
2	7	6	7
1	10	3	21
1	4	1	18
0	6	10	18
0	4	4	25
0	8	7	19
1	5	5	12
1	4	4	17
2	3	5	16
1	5	2	10
0	5	4	19
1	15	2	18
0	3	3	13
1	5	10	7
0	1	10	9
0	6	1	10
0	4	6	12
0	2	2	13
0	8	3	17
3	5	6	12
0	4	8	17
0	6	4	13
1	5	2	10
0	6	5	8

## Sheet: Figure 2F
Cell width
wild type	S86A	S261A	2A
3.796	4.121	3.785	5.225
3.908	4.239	4.055	4.548
3.836	3.851	4.003	4.302
3.914	3.986	3.7	4.751
3.933	3.867	3.922	4.434
3.751	4.384	4.308	5.173
3.698	3.815	4.028	4.481
3.843	4.153	3.83	4.512
3.691	3.882	3.874	4.709
3.933	3.989	3.981	4.461
3.748	4.068	3.787	4.589
3.834	4.081	3.994	4.773
3.695	3.901	3.886	4.747
3.829	4.03	4.01	5.135
3.779	4.05	4.028	4.254
3.754	4.171	4.024	4.185
3.676	3.944	3.775	5.154
3.806	3.762	4.089	4.42
3.78	4.321	4.029	4.212
3.867	4.062	3.83	4.511
3.698	3.816	4.498	4.683
3.671	4.221	3.792	4.447
3.832	3.739	4.007	4.315
4.036	3.775	3.848	4.962
3.775	4.159	3.716	5.333
3.865	3.749	4.086	4.667
3.597	4.148	3.83	5.101
3.796	3.783	3.7	4.683
3.76	3.939	3.937	5.314
3.705	3.863	3.976	4.334
3.852	3.984	4.235	4.076
3.745	4.175	3.97	4.141
3.918	4.061	3.998	4.885
3.858	3.882	4.086	4.763
3.582	3.818	3.708	4.539
3.947	3.881	3.76	4.696
3.683	3.92	4.318	4.585
3.686	3.992	3.959	4.556
3.947	3.87	3.722	4.996
3.712	4.133	3.681	4.307
3.676	3.817	4.175	4.486
3.889	4.145	4.071	4.881
3.917	3.808	3.844	4.364
3.827	3.835	3.863	4.424
3.973	3.905	4.052	4.811
3.676	4.042	3.805	4.95
3.702	3.896	3.869	4.629
3.89	4.214	3.807	5.031
3.825	3.966	4.097	4.709
3.804	4.016	3.919	4.594
3.748	3.914	3.877	4.736
3.673	3.744	3.9	4.374

## Sheet: Figure 2G
Septation index
wild type	S86A	S261A	2A
15.7576	14.4444	15.3846	38.2653
16.2651	16.3158	17.6768	35.2601
18.2292	18.3333	16.9697	32.1244
