# Supplementary material for: Pak1 kinase controls cell shape through ribonucleoprotein granules
Source: eLife. 2021 Jul 20;10:e67648. doi: 10.7554/eLife.67648 (PMC8318594; doi:10.7554/eLife.67648)
Supplement: Figure 3—source data 1. [file elife-67648-fig3-data1.xlsx]

## Sheet: Figure 3B
Number of Sts5 granules			Number of P-bodies			Number of colocalized Sts5 granules/P-bodies
wild type	2A		wild type	2A		0	6
0	12		10	21		0	11
0	21		5	31		0	4
0	11		7	19		1	5
1	18		11	13		0	7
0	15		9	20		1	7
1	17		9	24		1	8
1	14		6	30		1	9
1	13		7	20		0	5
0	8		10	18		0	8
0	14		5	23		0	6
1	15		8	18		0	6
0	14		10	17		0	6
0	12		9	18		0	3
0	10		12	12		0	5
0	12		5	12		0	7
0	12		2	16		0	14
0	16		5	36		0	4
0	7		12	28		0	4
0	11		6	15		0	6
0	18		9	19		0	9
0	15		5	22		0	9
0	12		12	24		0	6
0	16		6	20		0	8
1	19		12	18		0	4
0	13		3	19		1	7
1	11		7	22		0	5
0	12		10	17		0	8
0	14		8	19		0	6
0	11		7	18		0	4
0	7		10	23		0	3
0	5		5	13		0	6
0	9		7	17		0	5
0	13		9	14		0	8
0	13		7	23		1	4
2	8		9	11

## Sheet: Figure 3D
Normalized mean intensity
wild type	S86A	S261A	2A
1	0.689278	0.388232	0.11603
1	0.503267	0.440925	0.148027
1	0.166163	0.171582	0.0881964
