# Supplementary material for: Pak1 kinase controls cell shape through ribonucleoprotein granules
Source: eLife. 2021 Jul 20;10:e67648. doi: 10.7554/eLife.67648 (PMC8318594; doi:10.7554/eLife.67648)
Supplement: Figure 4—source data 1. [file elife-67648-fig4-data1.xlsx]

## Sheet: Figure 4B
Normalized mean intensity
wild type	S86A	S261A	2A
53.5088	39.1364	42.6523	16.8259
36.3036	30.3468	27.5676	12.3134
40.8051	23.1117	27.781	10.9959

## Sheet: Figure 4C
Normalized transcript count
wild type	2A
4746	3668
4922	3730
4852	3687

## Sheet: Figure 4E
Normalized mean intensity
wild type	S86A	S261A	2A
3.62998	3.44363	4.02726	1.9717
4.38614	3.65128	4.2	2.9322
4.52522	3.85437	4.25962	2.56731

## Sheet: Figure 4F
Normalized transcript count
wild type	2A
1911	1682
1944	1589
2026	1655
