# Supplementary material for: Pak1 kinase controls cell shape through ribonucleoprotein granules
Source: eLife. 2021 Jul 20;10:e67648. doi: 10.7554/eLife.67648 (PMC8318594; doi:10.7554/eLife.67648)
Supplement: Figure 8—figure supplement 1—source data 1. [file elife-67648-fig8-figsupp1-data1.xlsx]

## Sheet: Figure 8-figure supplement 1B
Cell length			Cell width
wild type	Pak1-CAAX		wild type	Pak1-CAAX
13.402	10.303		3.959	4.784
14.027	11.286		3.988	4.631
11.507	10.869		3.727	4.73
13.44	11.004		3.924	4.526
12.54	11.455		4.082	4.134
10.899	9.735		3.849	4.324
12.896	11.348		4.078	4.789
11.953	10.134		4.244	4.557
13.844	10.463		4.04	4.641
13.347	10.958		3.717	4.394
13.267	10.981		3.906	4.316
12.312	9.962		3.808	4.572
12.248	11.745		4.292	4.472
12.497	10.791		4.243	4.909
12.886	9.195		4.043	4.822
13.393	11.772		4.449	4.526
14.062	9.379		3.888	5.22
14.113	8.973		3.824	4.728
13.758	11.061		4	4.197
13.592	12.231		3.954	4.582
12.781	9.915		3.931	4.514
13.721	10.653		3.694	4.707
13.655	9.903		4.215	4.53
14.144	11.45		3.945	4.846
14.263	9.845		3.85	4.741
13.277	10.439		3.964	4.296
13.874	11.074		3.695	4.505
13.266	10.902		3.843	4.528
12.257	10.134		4.048	4.954
12.5	10.438		3.784	4.151
13.193	10.492		3.795	4.508
12.647	9.56		3.974	4.801
15.04	10.935		3.692	4.966
13.821	10.285		4.018	5.024
14.199	11.44		3.965	4.654
12.102	10.042		3.638	4.595
12.887	10.314		4.046	4.663
12.983	10.078		3.88	4.51
12.227	11.309		4.074	4.635
13.755	10.639		3.653	4.72
13.701	10.298		3.862	4.484
12.557	10.192		3.635	4.607
13.903	9.275		3.858	4.964
13.156	9.925		3.778	4.784
13.227	11.482		3.847	4.493
15.195	9.941		4.129	4.135
14.388	10.184		3.576	4.661
13.066	9.952		3.918	4.413
13.291	10.657		3.992	4.474
12.721	10.237		4.062	4.728
12.617	11.703		3.852	4.633
14.522	11.229		3.809	4.67

## Sheet: Figure 8-figure supplement 1C
Fluorescence intensity (AU)
	wild type	wild type	wild type	Pak1-CAAX	Pak1-CAAX	Pak1-CAAX
Time (minutes)	Mean (replicate 1)	Mean (replicate 2)	Mean (replicate 3)	Mean (replicate 1)	Mean (replicate 2)	Mean (replicate 3)
0	315.794	271.605	340.091	338.92	292.393	285.298
2	305.528	279.859	249.88	325.593	329.589	360.941
4	180.107	189.368	191.027	220.814	243.222	254.41
6	158.129	149.645	163.128	232.089	236.493	232.16
8	152.172	143.961	168.529	188.601	197.572	155.173
10	125.529	119.993	118.684	140.972	155.162	134.493

## Sheet: Figure 8-figure supplement 1D
Fluorescence intensity (AU)
wild type (1)	Pak1-CAAX (1)	wild type (2)	Pak1-CAAX (2)	wild type (3)	Pak1-CAAX (3)
137.637	301.391	144.427	242.689	118.186	371.859
202.678	211.254	127.358	171.484	124.988	315.456
210.836	321.497	149.835	199.484	150.123	160.444
154.001	427.257	284.03	217.047	139.179	121.845
222.865	204.423	155.138	198.634	175.933	372.73
139.061	337.654	272.922	225.023	129.881	187.476
145.306	232.849	187.754	161.162	128.487	221.597
132.694	264.164	136.088	252.997	178.4	178.256
135.42	333.158	84.509	205.192	207.988	104.578
105.359	283.873	139.476	187.222	147.71	242.151
162.599	250.099	222.716	283.464	187.201	121.147
144.212	245.899	147.415	220.778	138.162	263.898
268.761	201	164.344	165.539	127.536	146.409
205.427	209.361	178.059	183.728	88.235	171.336
202.732	320.606	165.679	193.602	145.171	203.074
221.694	197.413	233.089	187.045	155.163	254.214
137.929	225.53	147.777	237.208	284.465	354.415
127.869	154.326	196.243	188.169	142.776	268.676
226.959	214.339	147.486	299.7	121.574	390.276
339.132	306.782	162.515	392.321	143.608	220.266
92.696	183.357	131.816	323.576	123.353	189.703
67.426	171.979	160.774	233.587	125.017	266.649
140.122	233.097	122.322	235.902	117.455	310.799
169.684	262.478	210.642	274.925	149.282	218.209
182.837	166.237	164.889	159.417	148.412	185.021
92.354	163.566	138.588	234.167	175.667	238.717
109.817	273.412	134.194	165.383	170.897	327.517
190.788	277.084	148.644	286.502	263.898	204.461
151.23	254.539	161.407	177.665	125.339	248.456
116.031	132.741	131.997	353.438	189.55	331.329
138.365	145.952	131.917	221.479	143.274	173.905
153.452	192.465	147.08	172.828	199.154	191.841
151.584	188.232	156.916	348.698	271.629	176.833
154.124	412.373	132.526	193.4	177.226	343.805
111.535	249.743	156.494	197.231	213.371	181.501
108.701	192.563	117.328	186.897	189.833	207.384
105.101	99.803	148.547	152.658	191.642	176.479
130.155	218.999	131.617	300.279	125.199	227.626
161.052	262.825	223.042	233.393	170.47	159.388
136.953	148.559	175.811	231.919	132.167	188.359
121.477	378.15	101.73	351.929	226.908	287.106
140.739	247.353	94.095	277.768	124.455	338.795
196.547	95.274	113.53	264.067	113.12	186.834
204.397	141.542	78.263	234.656	202.935	205.901
183.661	216.476	145.386	442.658	216.777	258.878
97.796	205.162	90.449	258.49	256.419	171.957
139.556	265.25	96.377	93.998	109.165	177.31
212.365	213.223	88.413	269.225	143.523	235.789
148.839	172.135	92.608	178.666	122.343	228.644
173.918	197.02	107.982	357.368	203.143	298.708
