# Supplementary material for: Pak1 kinase controls cell shape through ribonucleoprotein granules
Source: eLife. 2021 Jul 20;10:e67648. doi: 10.7554/eLife.67648 (PMC8318594; doi:10.7554/eLife.67648)
Supplement: Figure 8—source data 1. [file elife-67648-fig8-data1.xlsx]

## Sheet: Figure 8C
Fluorescence intensity (AU)
	wild type	wild type	Pak1-CAAX	Pak1-CAAX
Time (minutes)	Mean	Standard deviation	Mean	Standard deviation
0	611.931	339.95	532.262	209.643
2	468.727	239.989	458.551	262.486
4	237.211	75.389	395.348	182.182
6	164.582	62.5383	274.282	113.753
8	167.713	55.5469	227.809	62.7514
10	182.13	80.9444	167.239	58.7382

## Sheet: Figure 8D
Number of Sts5-mNG granules
	wild type	wild type	Pak1-CAAX	Pak1-CAAX
Time (minutes)	Mean	Standard deviation	Mean	Standard deviation
0	6.86	1.72627	7.26	2.14581
2	6.66	2.20028	7.32	1.94244
4	4.96	2.05992	6.42	1.70342
6	1.32	1.4769	2.58	1.47205
8	0.68	0.867556	2.1	1.26572
10	0.64	0.776176	0.92	1.02698
