# Supplementary material for: Pak1 kinase controls cell shape through ribonucleoprotein granules
Source: eLife journal article supplement (doi:10.7554/elife.67648), 2021-07-20
Supplement: supp [file elife-67648-supp-v1.zip]

Archive with 19 entries (19 files):
- elife_poa_e67648_Figure_1_figure_supplement_1.pdf
- elife_poa_e67648_Figure_1_figure_supplement_2.pdf
- elife_poa_e67648_Figure_2_figure_supplement_1.pdf
- elife_poa_e67648_Figure_2_figure_supplement_2.pdf
- elife_poa_e67648_Figure_2_figure_supplement_3.pdf
- elife_poa_e67648_Figure_2_figure_supplement_4.pdf
- elife_poa_e67648_Figure_3_figure_supplement_1.pdf
- elife_poa_e67648_Figure_3_figure_supplement_2.pdf
- elife_poa_e67648_Figure_4_figure_supplement_1.pdf
- elife_poa_e67648_Figure_4_figure_supplement_2.pdf
- elife_poa_e67648_Figure_5_figure_supplement_1.pdf
- elife_poa_e67648_Figure_5_figure_supplement_2.pdf
- elife_poa_e67648_Figure_5_figure_supplement_3.pdf
- elife_poa_e67648_Figure_8_figure_supplement_1.pdf
- elife_poa_e67648_Supplementary_file_1.xlsx
- elife_poa_e67648_Supplementary_file_2.xlsx
- elife_poa_e67648_Supplementary_file_3.xlsx
- elife_poa_e67648_Transparent_Reporting_File.docx
- elife_poa_e67648_Source_data_1.zip
