# Supplementary material for: Pak1 kinase controls cell shape through ribonucleoprotein granules
Source: eLife journal article supplement (doi:10.7554/elife.67648), 2021-07-20
Supplement: supp [file Figure 4-figure supplement 1-source data 1.xlsx]

## Sheet: Figure 4-figure supplement 1A
Normalized transcript count
wild type	2A
69991	38106
71352	39665
70625	38916

## Sheet: Figure 4-figure supplement 1B
Normalized transcript count
wild type	2A
3326	2867
3395	2862
3178	2735
