# Supplementary figures and images for: Pak1 kinase controls cell shape through ribonucleoprotein granules
Source: eLife journal article supplement (doi:10.7554/elife.67648), 2021-07-20

Figure 1 Supplement 1

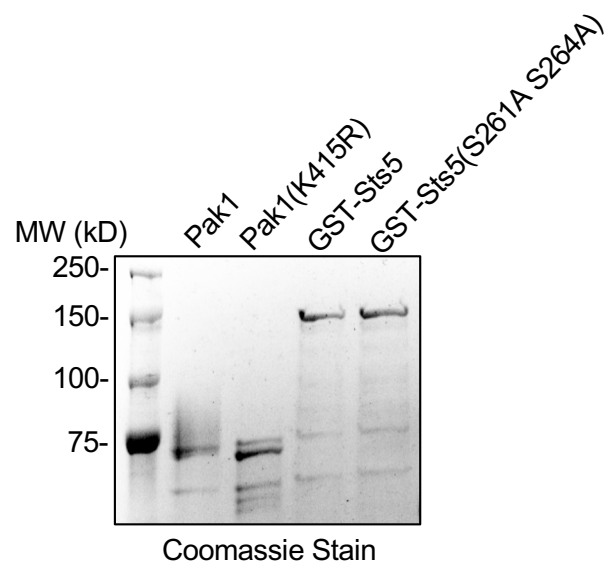

Supplement: supp [file elife-67648-supp-v1.zip › elife_poa_e67648_Figure_1_figure_supplement_1.pdf]

Figure 1-figure supplement 2

**A**

Autoradiogram

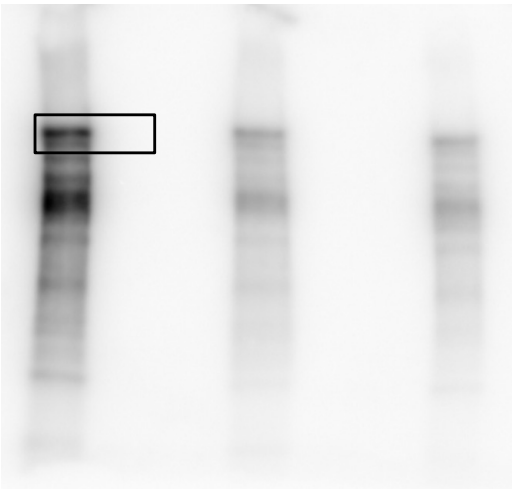

**B**

Autoradiogram

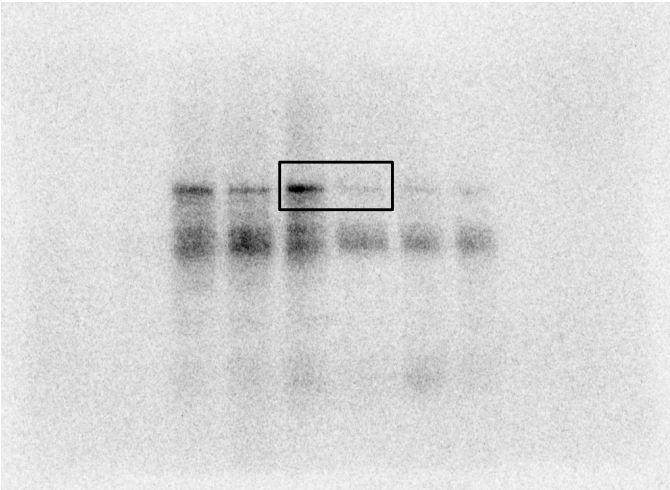

**C**

Silverstain

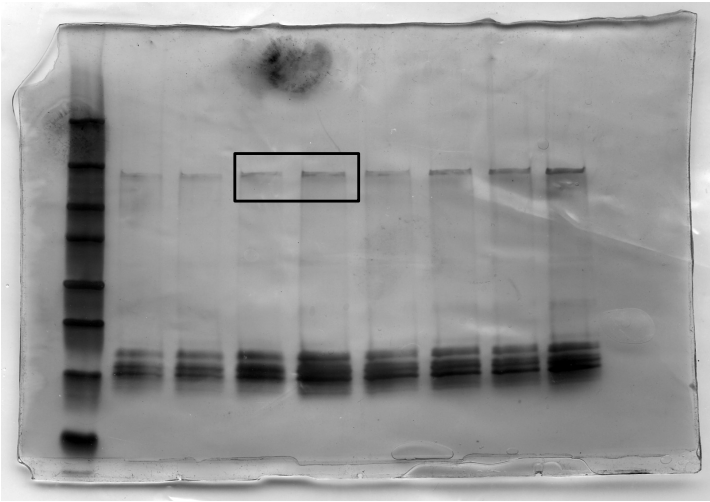

Supplement: supp [file elife-67648-supp-v1.zip › elife_poa_e67648_Figure_1_figure_supplement_2.pdf]

Figure 2 Supplement 1

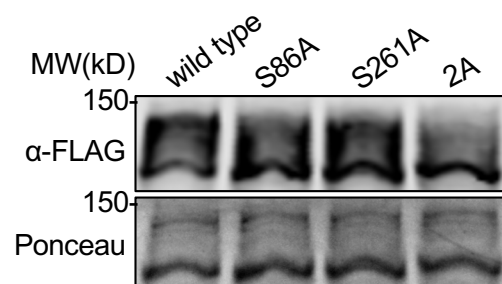

Supplement: supp [file elife-67648-supp-v1.zip › elife_poa_e67648_Figure_2_figure_supplement_1.pdf]

Figure 2 Supplement 2

**A**

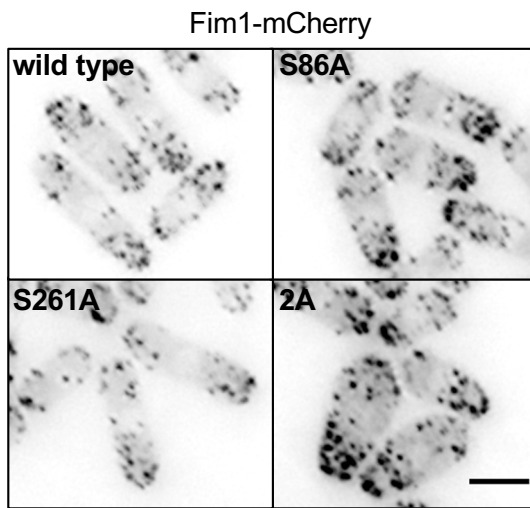

**B**

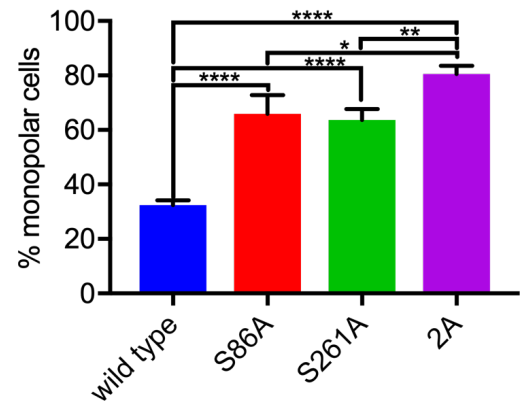

Supplement: supp [file elife-67648-supp-v1.zip › elife_poa_e67648_Figure_2_figure_supplement_2.pdf]

Figure 2 Supplement 3

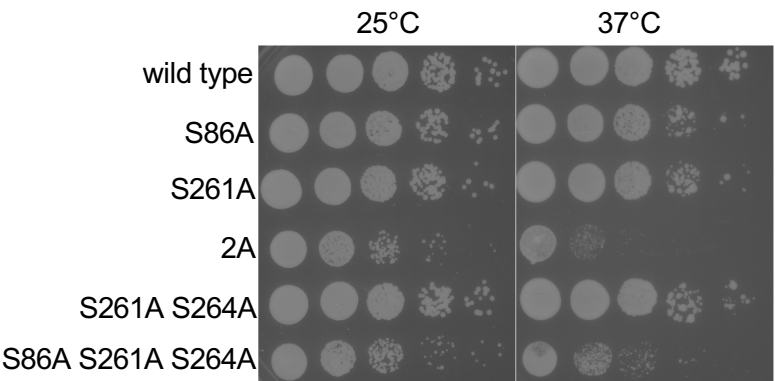

Supplement: supp [file elife-67648-supp-v1.zip › elife_poa_e67648_Figure_2_figure_supplement_3.pdf]

Figure 2-figure supplement 4

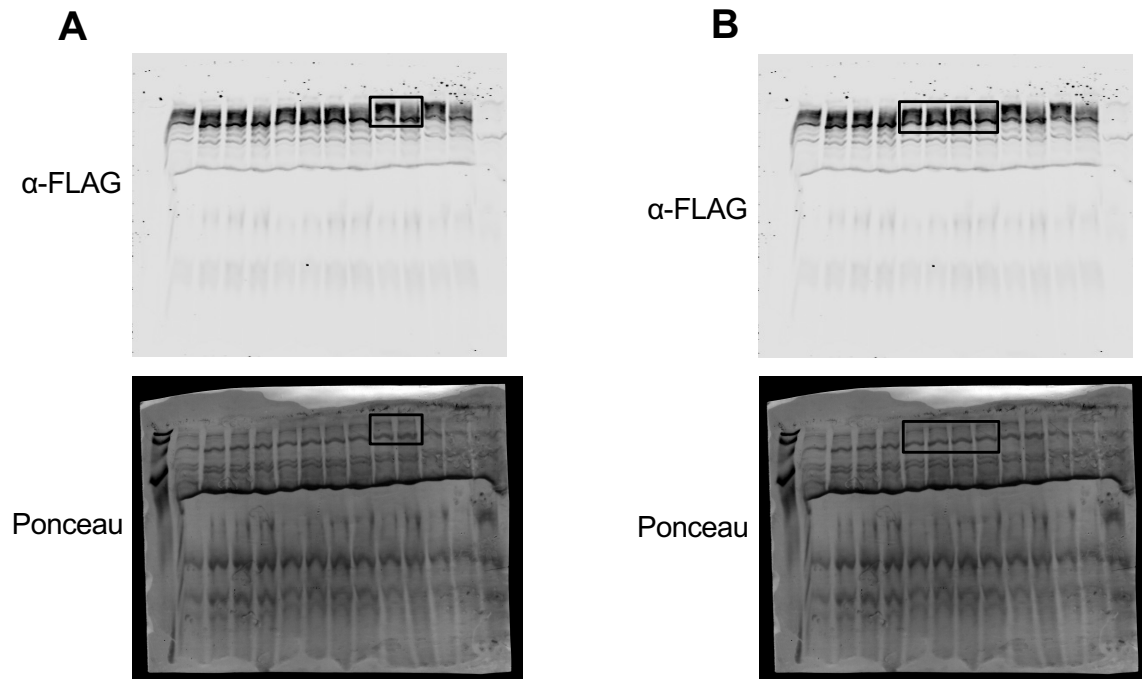

Supplement: supp [file elife-67648-supp-v1.zip › elife_poa_e67648_Figure_2_figure_supplement_4.pdf]

Figure 3 Supplement 1

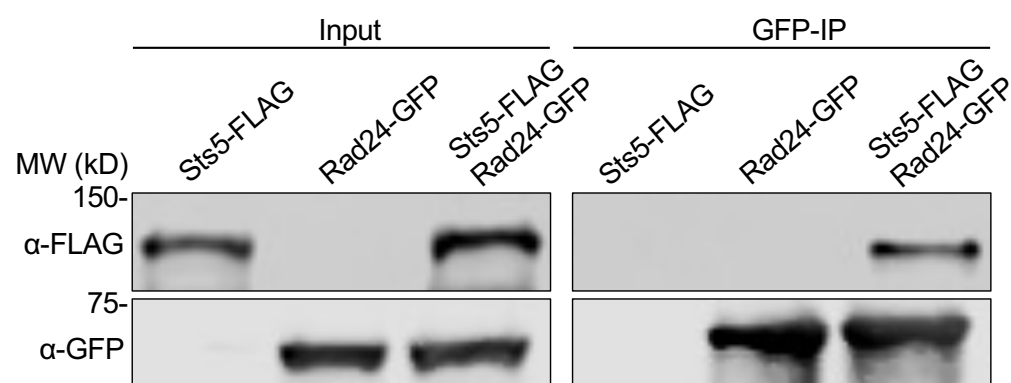

Supplement: supp [file elife-67648-supp-v1.zip › elife_poa_e67648_Figure_3_figure_supplement_1.pdf]

Figure 3-figure supplement 2

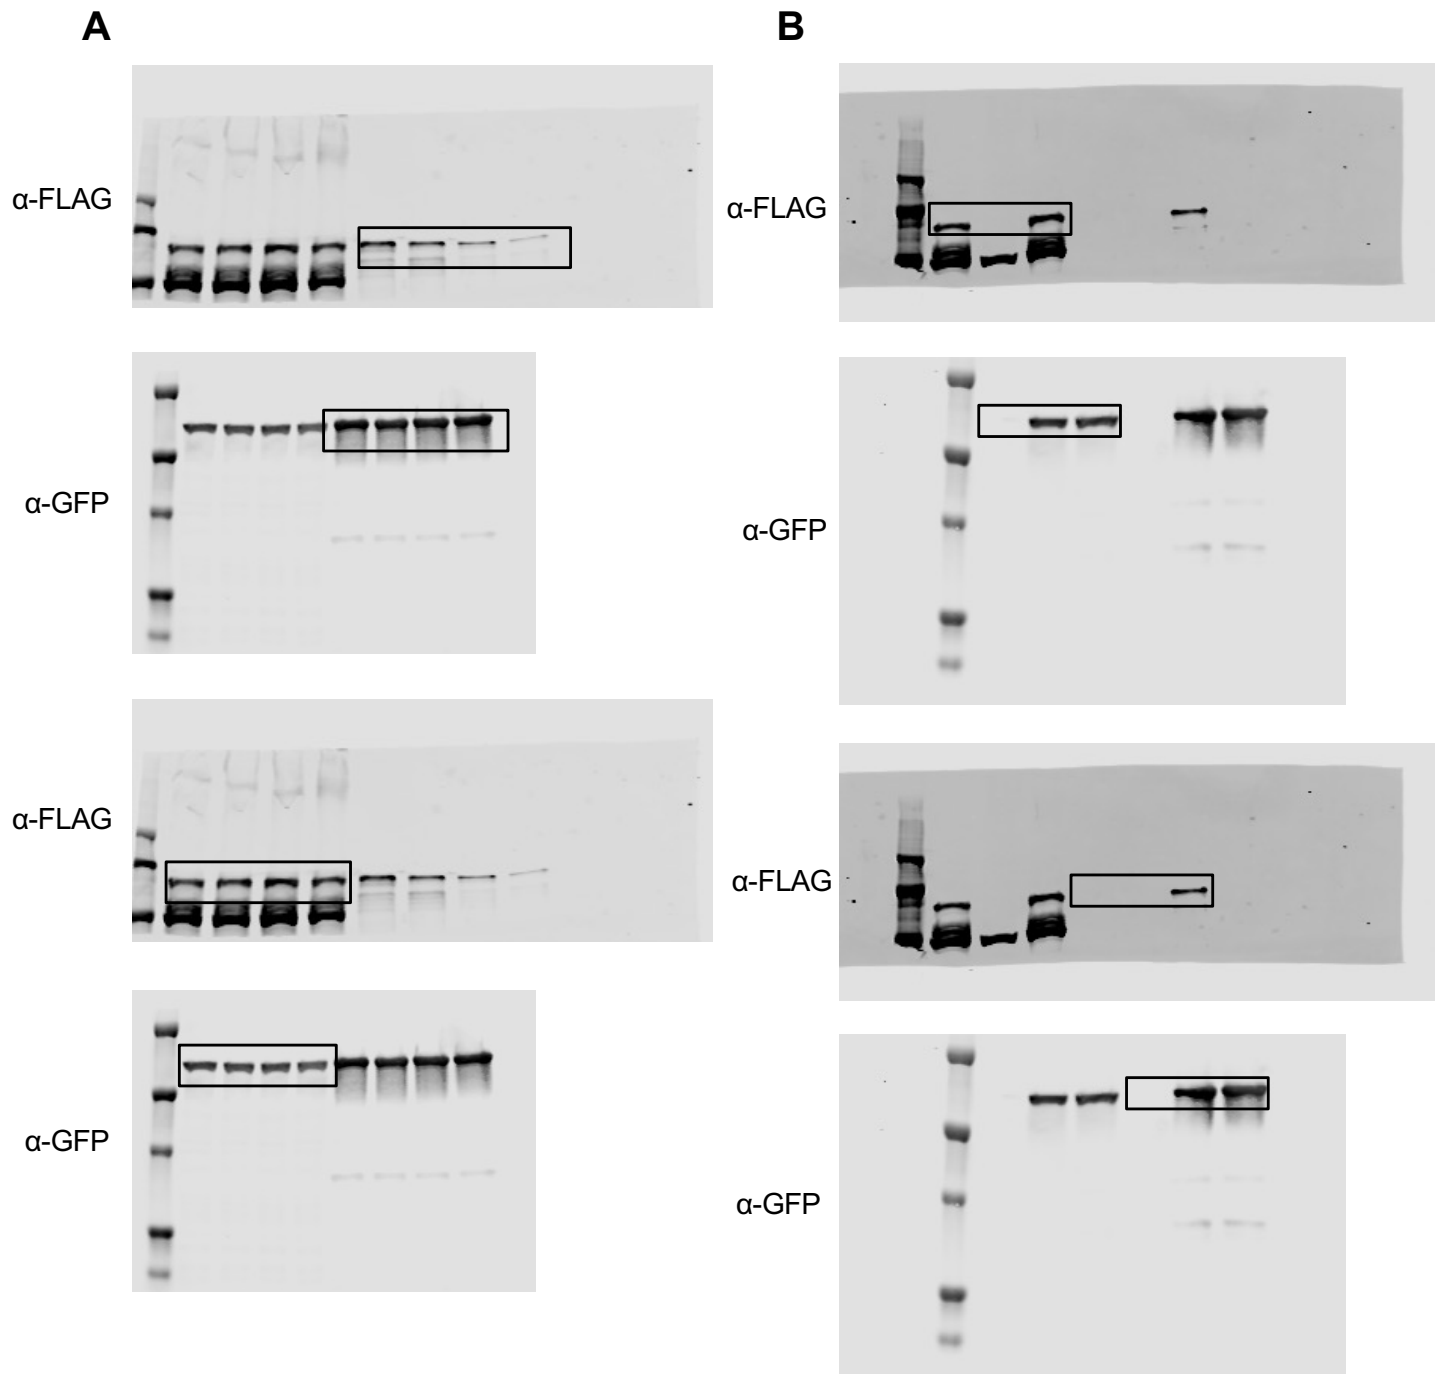

Supplement: supp [file elife-67648-supp-v1.zip › elife_poa_e67648_Figure_3_figure_supplement_2.pdf]

Figure 4 Supplement 1

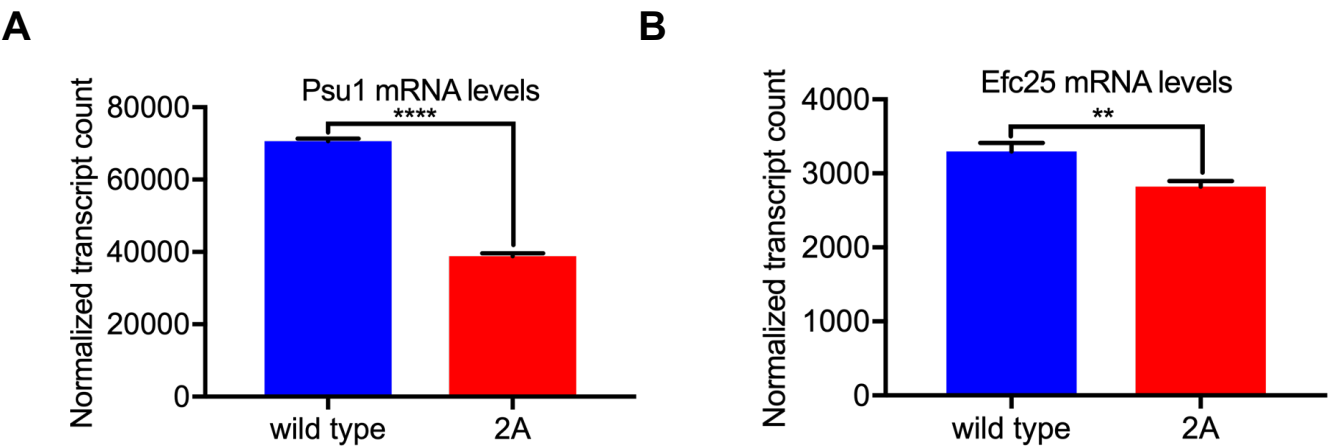

Supplement: supp [file elife-67648-supp-v1.zip › elife_poa_e67648_Figure_4_figure_supplement_1.pdf]

Figure 4-figure supplement 2

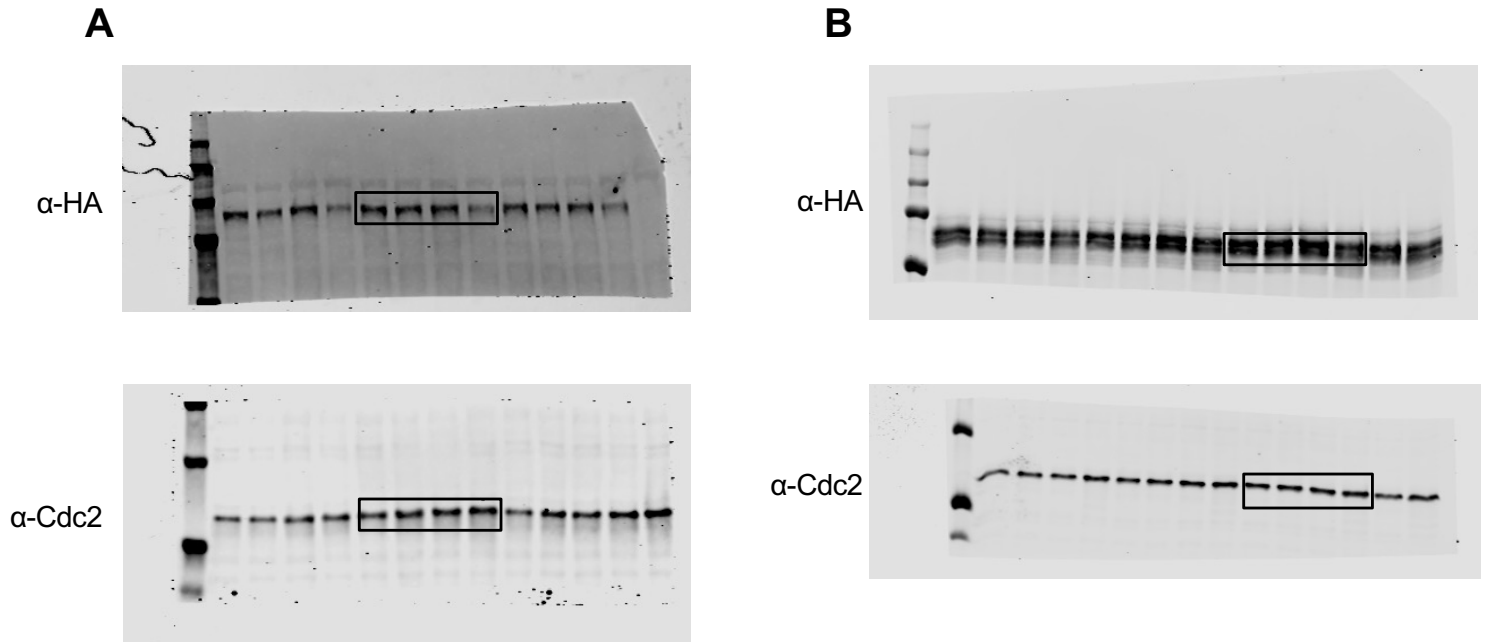

Supplement: supp [file elife-67648-supp-v1.zip › elife_poa_e67648_Figure_4_figure_supplement_2.pdf]

Figure 5 Supplement 1

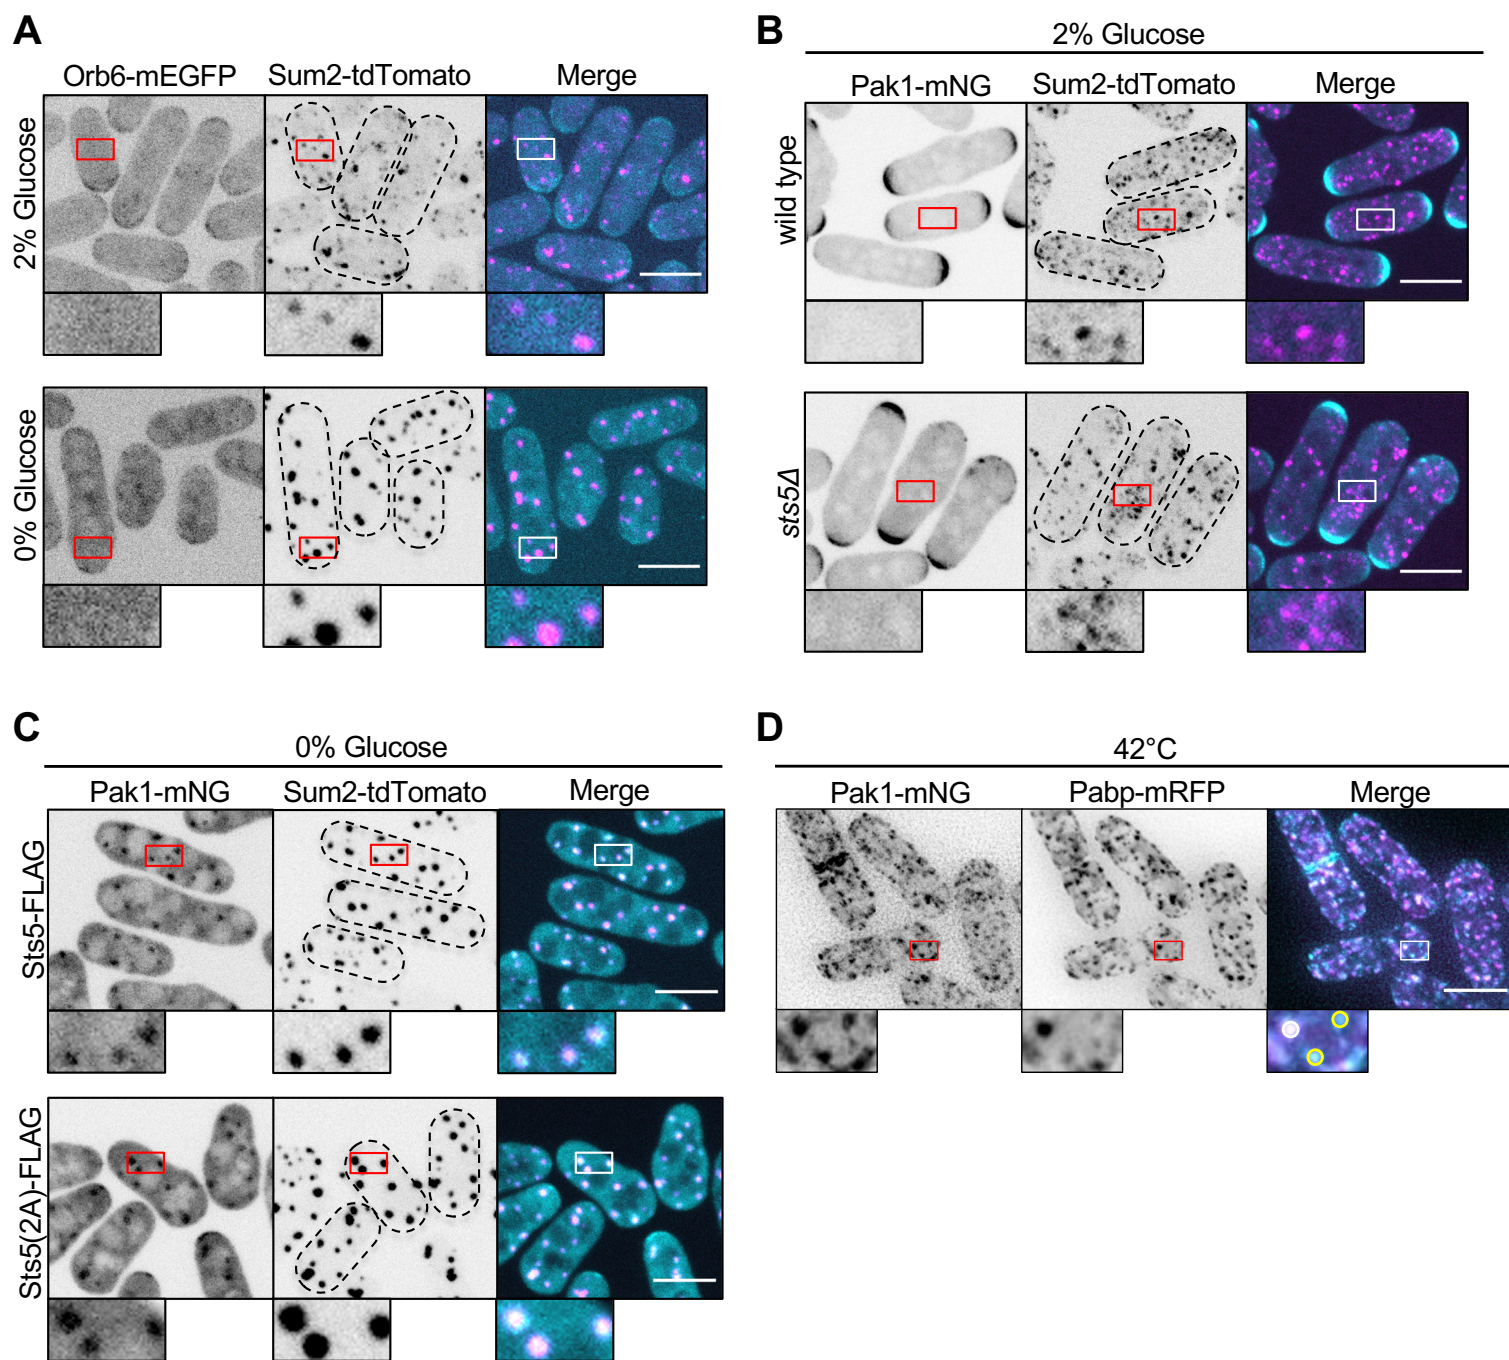

Supplement: supp [file elife-67648-supp-v1.zip › elife_poa_e67648_Figure_5_figure_supplement_1.pdf]

Figure 5 Supplement 2

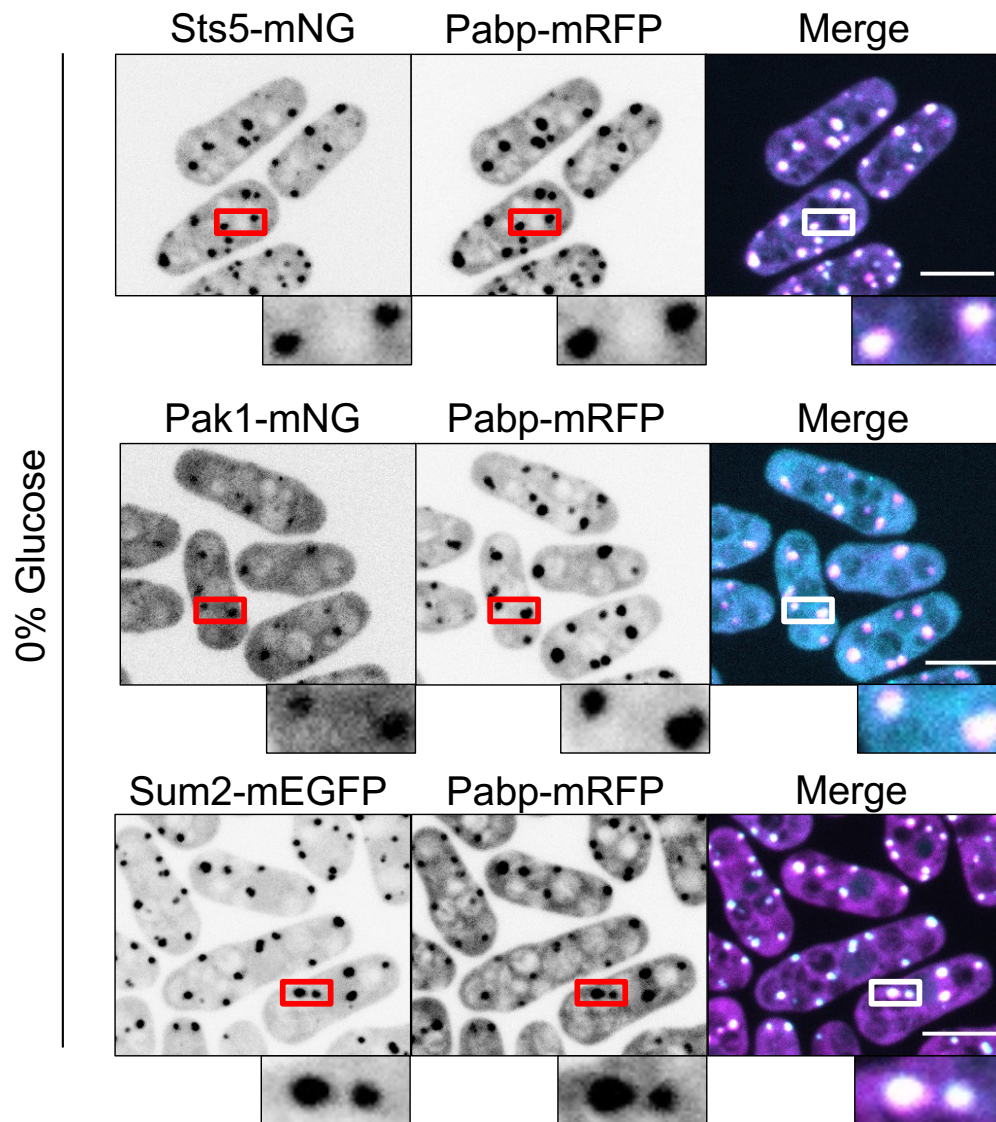

Supplement: supp [file elife-67648-supp-v1.zip › elife_poa_e67648_Figure_5_figure_supplement_2.pdf]

Figure 5 Supplement 3

**A**

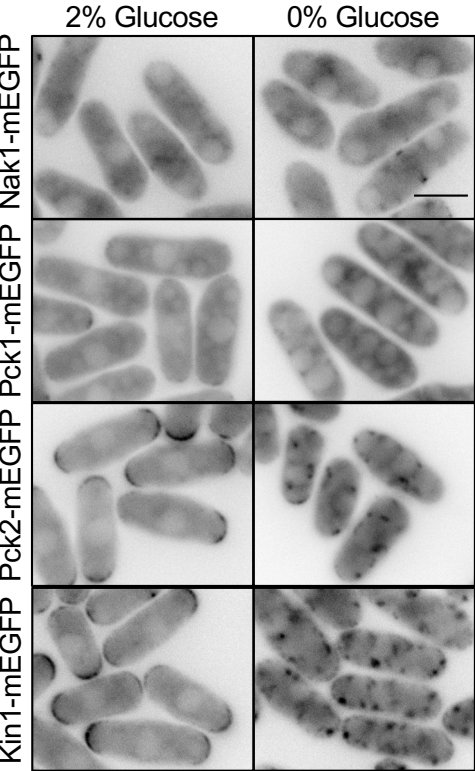

**B**

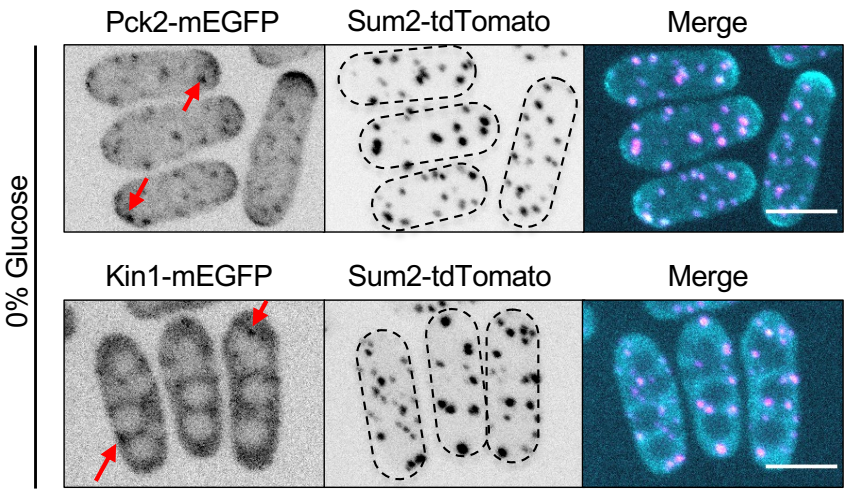

Supplement: supp [file elife-67648-supp-v1.zip › elife_poa_e67648_Figure_5_figure_supplement_3.pdf]

# Figure 8 Supplement 1

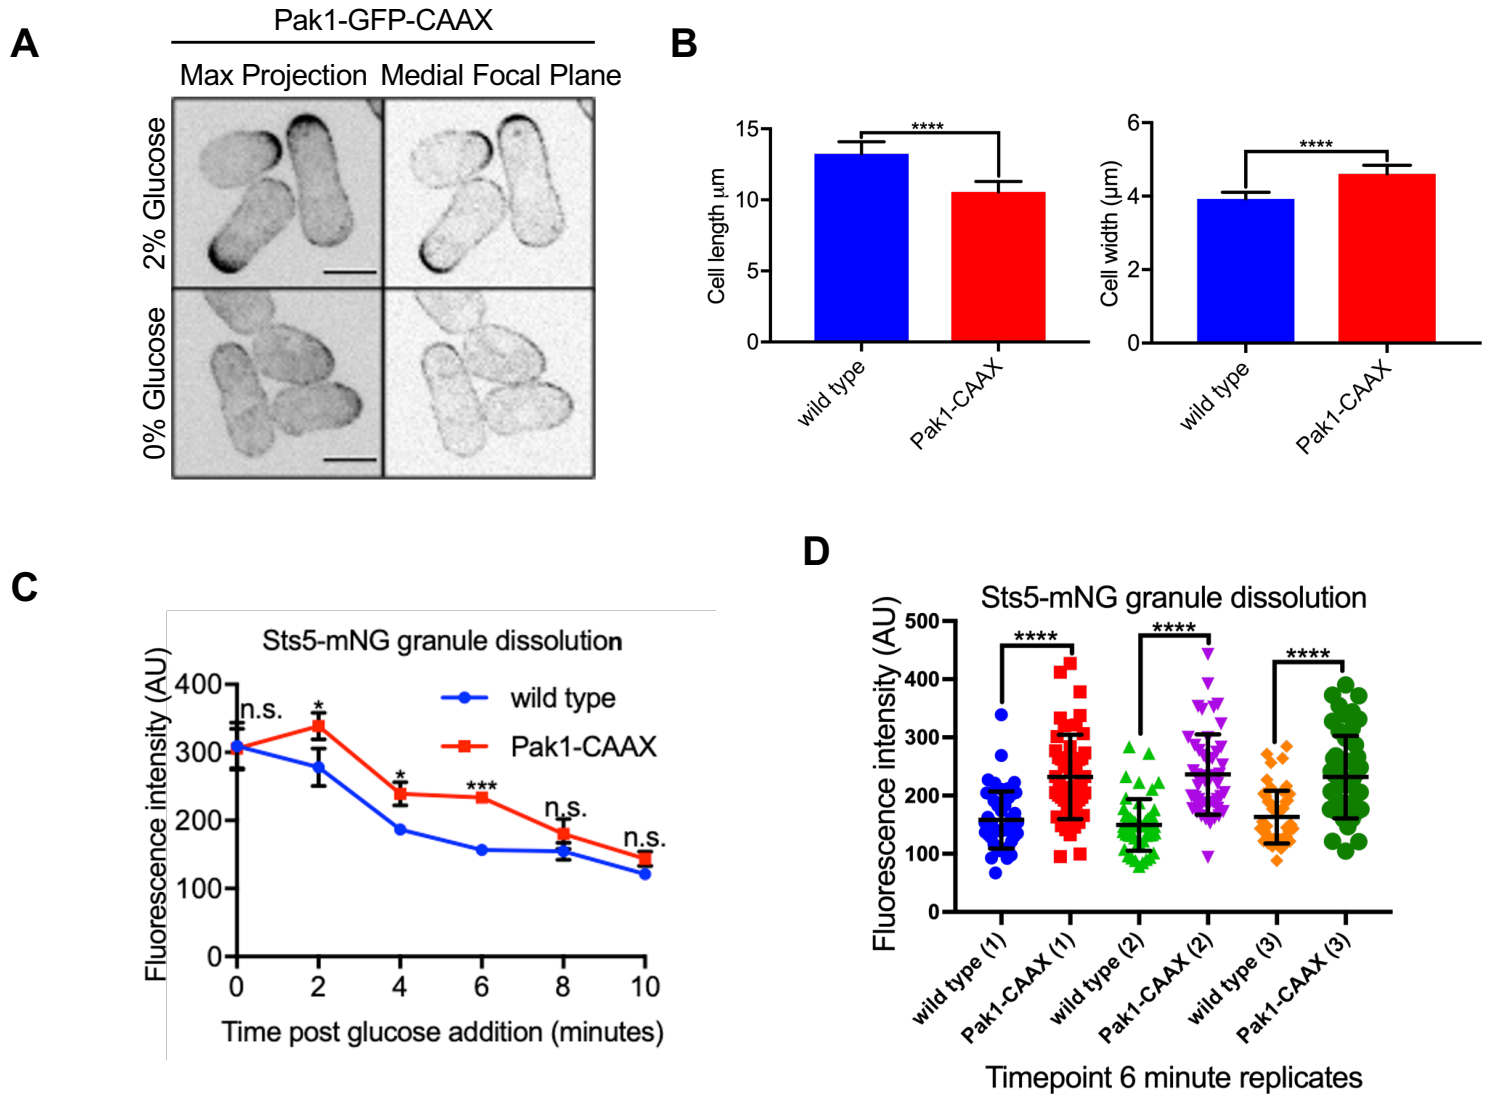

Supplement: supp [file elife-67648-supp-v1.zip › elife_poa_e67648_Figure_8_figure_supplement_1.pdf]
